CORRECTION

# Correction: Beyond eves and cracks: An interdisciplinary study of socio-spatial variation in urban malaria transmission in Ethiopia

Claudia Nieto-Sanchez, Stefanie Dens, Kalkidan Solomon, Asgedom Haile, Yue Yuan, Thomas Hawer, Delenasaw Yewhalaw, Adamu Addissie, Koen Peeters Grietens

The ORCID iD of the second author is incorrect. Please see the author's correct ORCID iD here:  
Author Stefanie Dens' ORCID iD is 0000-0002-6680-3645 (<https://orcid.org/0000-0002-6680-3645>).

## Reference

1. Nieto-Sanchez C, Dens S, Solomon K, Haile A, Yuan Y, Hawer T, et al. (2022) Beyond eves and cracks: An interdisciplinary study of socio-spatial variation in urban malaria transmission in Ethiopia. PLOS Glob Public Health 2(4): e0000173. <https://doi.org/10.1371/journal.pgph.0000173> PMID: 36962186

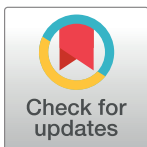

## OPEN ACCESS

**Citation:** Nieto-Sanchez C, Dens S, Solomon K, Haile A, Yuan Y, Hawer T, et al. (2024) Correction: Beyond eves and cracks: An interdisciplinary study of socio-spatial variation in urban malaria transmission in Ethiopia. PLOS Glob Public Health 4(7): e0003593. <https://doi.org/10.1371/journal.pgph.0003593>

**Published:** July 31, 2024

**Copyright:** © 2024 Nieto-Sanchez et al. This is an open access article distributed under the terms of the [Creative Commons Attribution License](https://creativecommons.org/licenses/by/4.0/), which permits unrestricted use, distribution, and reproduction in any medium, provided the original author and source are credited.
